# Supplementary material
Source: PubMed Central journal article supplement (PMC2964208)
Supplement: 1003540107_pnas.201003540SI.pdf [file 1003540107_pnas.201003540SI.pdf]

# Supporting Information

Beekman et al. 10.1073/pnas.1003540107

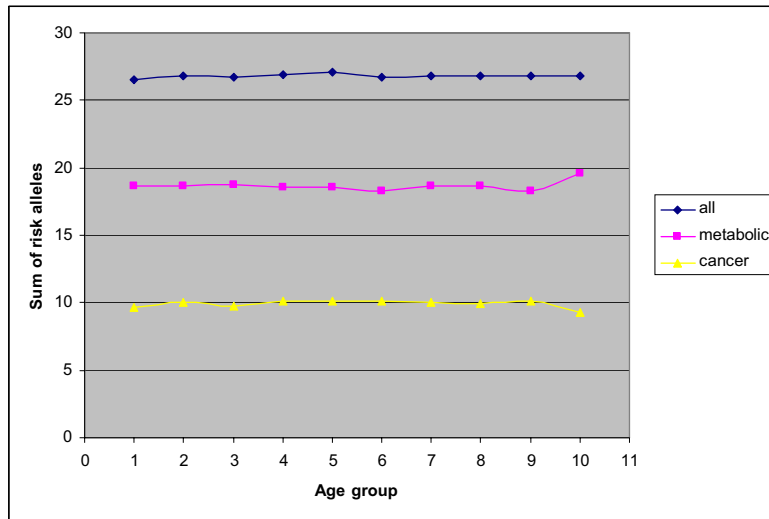

**Fig. S1.** The study population was divided into 10 age groups: (1) <26 y ( $n = 116$ ), (2) 26–35 y ( $n = 576$ ), (3) 36–45 y ( $n = 247$ ), (4) 46–55 y ( $n = 344$ ), (5) 56–65 y ( $n = 457$ ), (6) 66–75 y ( $n = 135$ ), (7) 76–85 y ( $n = 547$ ), (8) 86–95 y ( $n = 1,029$ ), (9) 96–98 y ( $n = 101$ ), and (10)  $\geq 99$  y ( $n = 38$ ). Per age group, the mean number of risk alleles was determined for the sum of all risk alleles (blue), sum of the subset of metabolic risk alleles (pink), and subset of the cancer risk alleles (yellow).

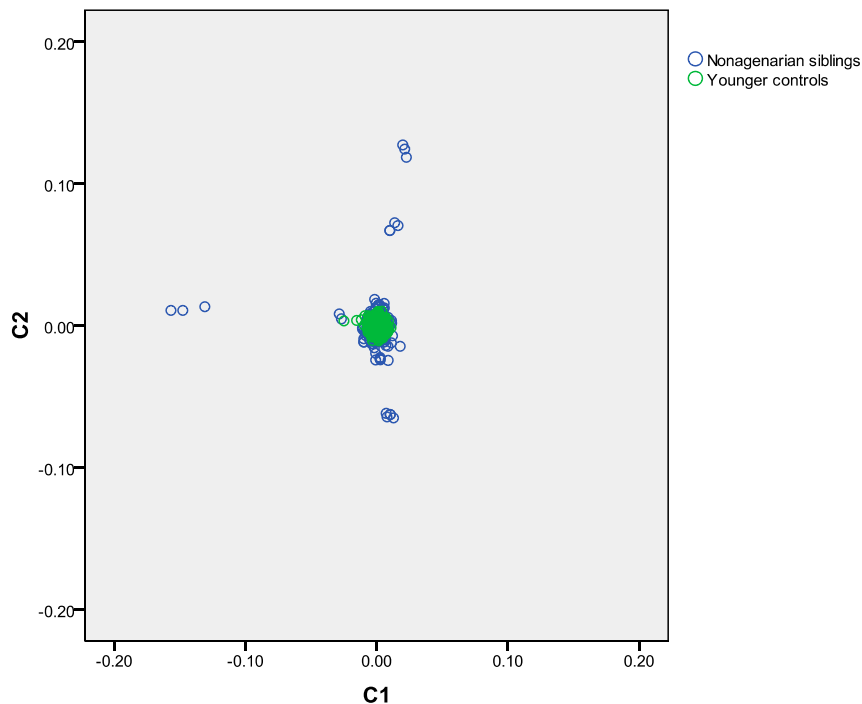

**Fig. S2.** Four small clusters are located apart from the main large cluster. These four clusters contain four separate families, each consisting of three nonagenarians. Because these four families report that they are of Dutch ancestry and because these are single-family clusters relatively close to the majority of the samples, we conclude that there is no substructure among the participants of the LLS to an extent that would affect our conclusions.

**Table S1. Overview of loci associated with heart disease, cancer, and type 2 diabetes up to February 2009 in at least two independent GWASs**

| Locus             | Chromosome      | Nearest genes           | SNP*              | Position         | Risk/Non risk <sup>†</sup> | Associated disease | OR <sup>§</sup>                                     | References                              |
|-------------------|-----------------|-------------------------|-------------------|------------------|----------------------------|--------------------|-----------------------------------------------------|-----------------------------------------|
| 1                 | 1p13.3          | CELSR2, PSRC1           | rs599839          | 109623689        | A/G                        | CAD                | 1.39                                                | (1, 2)                                  |
|                   |                 |                         | <b>rs646776</b>   | <b>109620053</b> | <u>T/C</u>                 | CAD                | —                                                   | Surrogate for rs599839 ( $r^2 = 0.94$ ) |
| 2                 | 2q32.3          | TMEFF2                  | <b>rs10497721</b> | <b>192622607</b> | <u>A/C</u> <sup>‡</sup>    | T2D                | —                                                   | (3)                                     |
|                   |                 |                         | rs10497726        | 192759565        | <u>C/A</u> <sup>‡</sup>    | CAD                | —                                                   | (4)                                     |
|                   |                 |                         | rs10497723        | 192817829        | G/A                        | T2D                | 2.32                                                | (5)                                     |
| 3                 | 3p25.2          | PPARG                   | rs17036101        | 12252845         | G/A                        | T2D                | 1.15                                                | (6)                                     |
|                   |                 |                         | <b>rs1801282</b>  | <b>12368125</b>  | <u>C/G</u>                 | T2D                | 1.14                                                | (7–11)                                  |
| 4                 | 3q27.2          | IGF2BP2                 | <b>rs4402960</b>  | <b>186994381</b> | <u>T/G</u>                 | T2D                | 1.14                                                | (7–9, 12)                               |
|                   |                 |                         | rs1470579         | 187011774        | <u>C/A</u>                 | T2D                | 1.14                                                | (7, 13)                                 |
| 5                 | 4p16.1          | WFS1                    | <b>rs10010131</b> | <b>6343816</b>   | <u>G/A</u>                 | T2D                | 1.15                                                | (14, 15)                                |
|                   |                 |                         | rs6446482         | 6346594          | <u>G/C</u>                 | T2D                | 1.15                                                | (14, 15)                                |
|                   |                 |                         | rs734312          | 6354255          | A/G                        | T2D                | 1.23/1.25 <sup>¶</sup>                              | (14, 15)                                |
| 6                 | 5p15.33         | TERT-CLPTM1L            | rs402710          | 1373722          | C/T                        | LC                 | 1.18                                                | (16)                                    |
|                   |                 |                         | rs401681          | 1375087          | G/A                        | LC                 | 1.15                                                | (17)                                    |
|                   |                 |                         | <b>rs10515869</b> | <b>163444804</b> | <u>G/A</u> <sup>‡</sup>    | HF                 | —                                                   | (4)                                     |
| 8                 | 6p22.3          | CDKAL1                  | <b>rs6556756</b>  | <b>163821858</b> | <u>G/T</u> <sup>‡</sup>    | BC                 | —                                                   | (18)                                    |
|                   |                 |                         | rs9314033         | 163822784        | <u>C/A</u> <sup>‡</sup>    | BC                 | —                                                   | (18)                                    |
|                   |                 |                         | rs10946398        | 20769013         | <u>C/A</u>                 | T2D                | 1.12                                                | (9, 19)                                 |
| 9                 | 6q25.1          | MTHFD1L                 | <b>rs7754840</b>  | <b>20769229</b>  | <u>C/G</u>                 | T2D                | 1.12                                                | (7, 8, 20)                              |
|                   |                 |                         | rs7756992         | 20787688         | G/A                        | T2D                | 1.20                                                | (12, 21)                                |
|                   |                 |                         | rs9465871         | 20825234         | C/T                        | T2D                | 1.18/2.17 <sup>¶</sup>                              | (10)                                    |
|                   |                 |                         | <b>rs6922269</b>  | <b>151294678</b> | <u>A/G</u>                 | CAD                | 1.37                                                | (1, 10)                                 |
|                   |                 |                         | <b>rs13266634</b> | <b>118253964</b> | <u>C/T</u>                 | T2D                | 1.12                                                | (7–9, 12, 19, 21, 22)                   |
| 10                | 8q24.11         | SLC30A8                 | rs7001069         | 128179828        | A/G <sup>‡</sup>           | PC                 | —                                                   | (18)                                    |
|                   |                 |                         | rs10505483        | 128194377        | G/A <sup>‡</sup>           | PC                 | —                                                   | (18)                                    |
|                   |                 |                         | rs13281615        | 128424800        | G/A                        | BC                 | 1.08                                                | (23)                                    |
|                   |                 |                         | rs10505477        | 128476625        | G/A                        | CC, PC             | 1.27/1.43                                           | (24–26)                                 |
|                   |                 |                         | rs11985829        | 128478414        | <u>C/T</u> <sup>‡</sup>    | CC, PC             | 1.08/1.22                                           | (27)                                    |
|                   |                 |                         | rs10808556        | 128482329        | A/G                        | CC, PC             | 1.26/1.31                                           | (26, 27)                                |
|                   |                 |                         | <b>rs6983267</b>  | <b>128482487</b> | <u>G/T</u>                 | CC, PC             | 1.25/1.20                                           | (25, 27–30)                             |
|                   |                 |                         | rs7013278         | 128484074        | <u>C/T</u> <sup>‡</sup>    | CC                 | —                                                   | (27)                                    |
|                   |                 |                         | rs10505474        | 128486686        | G/A <sup>‡</sup>           | CC                 | —                                                   | (27)                                    |
|                   |                 |                         | rs2060776         | 128489299        | <u>T/G</u> <sup>‡</sup>    | CC                 | —                                                   | (27)                                    |
|                   |                 |                         | rs10956369        | 128492999        | <u>A/T</u> <sup>‡</sup>    | CC                 | —                                                   | (27)                                    |
|                   |                 |                         | <b>rs7014346</b>  | <b>128493974</b> | <u>A/G</u>                 | CC                 | 1.19                                                | (27, 31)                                |
|                   |                 |                         | rs4871789         | 128497243        | <u>A/G</u> <sup>‡</sup>    | CC                 | —                                                   | (27)                                    |
|                   |                 |                         | rs7842552         | 128500876        | G/A                        | CC                 | 1.15                                                | (31)                                    |
|                   |                 |                         | <b>rs1447295</b>  | <b>128554220</b> | <u>A/C</u>                 | PC                 | 1.43/2.23 <sup>¶</sup>                              | (26, 28, 32, 33)                        |
|                   |                 |                         | rs4242382         | 128586755        | <u>A/G</u>                 | PC                 | 1.66/2.22 <sup>¶</sup>                              | (29)                                    |
|                   |                 |                         | rs7837688         | 128608542        | <u>T/G</u>                 | PC                 | 1.46/2.03                                           | (28)                                    |
|                   |                 |                         | 12                | 9p21.3           | CDKN2BAS                   | <b>rs564398</b>    | <b>22019547</b>                                     | <u>T/C</u>                              |
| rs10757274        | 22086055        | <u>G/A</u>              |                   |                  |                            | CAD                | 1.18/1.29 <sup>¶</sup>                              | (35)                                    |
| rs1537371         | 22089568        | <u>A/C</u> <sup>‡</sup> |                   |                  |                            | CVD                | —                                                   | (4)                                     |
| rs1556516         | 22090176        | <u>C/G</u> <sup>‡</sup> |                   |                  |                            | CVD                | —                                                   | (4)                                     |
| rs10511701        | 22102599        | <u>C/T</u> <sup>‡</sup> |                   |                  |                            | CVD                | —                                                   | (4)                                     |
| rs2383206         | 22105026        | G/A                     |                   |                  |                            | CAD                | 1.26/1.26 <sup>¶</sup>                              | (35)                                    |
| rs2383207         | 22105959        | G/A                     |                   |                  |                            | CAD                | 1.25                                                | (36)                                    |
| <b>rs10757278</b> | <b>22114477</b> | <u>G/A</u>              |                   |                  |                            | CAD                | 1.28                                                | (11, 36)                                |
| <b>rs1333049</b>  | <b>22115503</b> | <u>C/G</u>              |                   |                  |                            | CAD                | 1.47/1.90 <sup>¶</sup>                              | (1, 10)                                 |
| <b>rs10811661</b> | <b>22124094</b> | <u>T/C</u>              |                   |                  |                            | T2D                | 1.20                                                | (7–9, 11, 12, 19)                       |
| rs1111875         | 94452862        | <u>C/T</u>              |                   |                  |                            | T2D                | 1.13                                                | (7–9, 12, 22)                           |
| 13                | 10q23.33        | HHEX                    |                   |                  |                            | rs5015480          | 94455539                                            | <u>C/T</u>                              |
|                   |                 |                         | rs7923837         | 94471897         | A/G                        | T2D                | 1.22/1.45 <sup>¶</sup>                              | (12, 22)                                |
| 14                | 10q25.2         | TCF7L2                  | rs7901695         | 114744078        | C/T                        | T2D                | 1.37                                                | (9, 37)                                 |
|                   |                 |                         | rs4506565         | 114746031        | T/A                        | T2D                | 1.36/1.88 <sup>¶</sup>                              | (10)                                    |
|                   |                 |                         | <b>rs7903146</b>  | <b>114748339</b> | <u>T/C</u>                 | T2D, CC            | 1.37/1.25–2.15 <sup>¶</sup>                         | (7, 10, 19, 22, 37–40)                  |
| 15                | 10q26.13        | FGFR2                   | rs12255372        | 114798892        | <u>T/G</u>                 | T2D, BC, PC        | 1.64/1.21–1.37 <sup>¶</sup> /1.09–1.15 <sup>¶</sup> | (37–39, 41, 42)                         |
|                   |                 |                         | rs1219648         | 123336180        | G/A                        | BC                 | 1.32                                                | (43, 44)                                |
|                   |                 |                         | <b>rs2420946</b>  | <b>123341314</b> | <u>T/C</u>                 | BC                 | 1.32                                                | (43, 45)                                |
|                   |                 |                         | rs2981582         | 123342307        | <u>A/G</u>                 | BC                 | 1.26                                                | (23, 45)                                |

Table S1. Cont.

| Locus | Chromosome | Nearest genes        | SNP*              | Position        | Risk/Non risk <sup>†</sup> | Associated disease | OR <sup>§</sup>        | References       |
|-------|------------|----------------------|-------------------|-----------------|----------------------------|--------------------|------------------------|------------------|
| 16    | 11p15.1    | KCNJ11               | rs5215            | 17365206        | C/T                        | T2D                | 1.14                   | (9)              |
|       |            |                      | <b>rs5219</b>     | <b>17366148</b> | T/C                        | T2D                | 1.14                   | (7, 8, 12, 19)   |
| 17    | 12q21.1    | TSPAN8               | <b>rs1495377</b>  | <b>69863368</b> | G/C                        | T2D                | 1.28/1.51 <sup>¶</sup> | (10)             |
|       |            |                      | rs7961581         | 69949369        | C/T                        | T2D                | 1.09                   | (6)              |
| 18    | 15q25.1    | LOC123688,<br>CHRNA3 | <b>rs8034191</b>  | <b>76593078</b> | T/C                        | LC                 | 1.30                   | (46–48)          |
|       |            |                      | rs1051730         | 76681394        | G/A                        | LC                 | 1.31                   | (16, 46, 47, 49) |
| 19    | 16q12.1    | TOX3                 | rs8042374         | 76695087        | G/A <sup>‡</sup>           | LC                 | —                      | (17)             |
|       |            |                      | <b>rs8051542</b>  | <b>51091668</b> | T/C                        | BC                 | 1.09                   | (23)             |
| 20    | 16q12.2    | FTO                  | <b>rs12443621</b> | <b>51105538</b> | G/A                        | BC                 | 1.11                   | (23)             |
|       |            |                      | rs3803662         | 51143842        | T/C                        | BC                 | 1.20                   | (23, 50, 51)     |
| 21    | 17q12      | HNF1B                | <b>rs8050136</b>  | <b>52373776</b> | A/C                        | T2D                | 1.17                   | (8, 9, 19, 52)   |
|       |            |                      | rs9939609         | 52378028        | A/T                        | T2D                | 1.34/1.55 <sup>¶</sup> | (10, 52)         |
| 22    | 18q21.1    | SMAD7                | <b>rs757210</b>   | <b>33170628</b> | T/C                        | T2D                | 1.12                   | (53, 54)         |
|       |            |                      | <b>rs4430796</b>  | <b>33172153</b> | A/G                        | PC, T2D            | 1.22/0.91 <sup>¶</sup> | (29, 54)         |
| 23    | Xp11.22    | NUDT11               | rs7501939         | 33175269        | C/T                        | PC                 | 1.19                   | (54, 55)         |
|       |            |                      | rs3760511         | 33180426        | C/A                        | PC                 | 1.16                   | (54)             |
| 22    | 18q21.1    | SMAD7                | <b>rs4939827</b>  | <b>44707461</b> | T/C                        | CC                 | 1.18                   | (30, 31, 56)     |
|       |            |                      | rs12953717        | 44707927        | T/C                        | CC                 | 1.17                   | (31, 56)         |
| 23    | Xp11.22    | NUDT11               | rs4464148         | 44713030        | C/T                        | CC                 | 1.15                   | (56)             |
|       |            |                      | <b>rs5945572</b>  | <b>51246423</b> | A/G                        | PC                 | 1.23                   | (57)             |
|       |            |                      | rs5945619         | 51258412        | T/C                        | PC                 | 1.19                   | (58)             |

BC, breast cancer; CAD, coronary artery disease; CC, colon carcinoma; CVD, cardiovascular disease; HF, heart failure; LC, lung cancer; PC, prostate cancer; T2D, type 2 diabetes.

\*SNPs genotyped in the LLS are denoted in bold.

<sup>†</sup>Major allele of genotyped SNPs is underlined.

<sup>‡</sup>Risk allele is not found in the literature; data are retrieved from SnpPer (ChIP Bioinformatics), and the minor allele is denoted first.

<sup>§</sup>OR per allele.

<sup>¶</sup>OR in heterozygotes and homozygotes, respectively.

- Samani NJ, et al.; WTCCC and the Cardiogenics Consortium (2007) Genomewide association analysis of coronary artery disease. *N Engl J Med* 357:443–453.
- Willer CJ, et al. (2008) Newly identified loci that influence lipid concentrations and risk of coronary artery disease. *Nat Genet* 40:161–169.
- Meigs JB, et al. (2007) Genome-wide association with diabetes-related traits in the Framingham Heart Study. *BMC Med Genet* 8(Suppl 1):S16.
- Larson MG, et al. (2007) Framingham Heart Study 100K project: Genome-wide associations for cardiovascular disease outcomes. *BMC Med Genet* 8(Suppl 1):S5.
- Hayes MG, et al. (2007) Identification of type 2 diabetes genes in Mexican Americans through genome-wide association studies. *Diabetes* 56:3033–3044.
- Zeggini E, et al.; Wellcome Trust Case Control Consortium (2008) Meta-analysis of genome-wide association data and large-scale replication identifies additional susceptibility loci for type 2 diabetes. *Nat Genet* 40:638–645.
- Saxena R, et al.; Diabetes Genetics Initiative of Broad Institute of Harvard and MIT, Lund University, and Novartis Institutes of BioMedical Research (2007) Genome-wide association analysis identifies loci for type 2 diabetes and triglyceride levels. *Science* 316:1331–1336.
- Scott LJ, et al. (2007) A genome-wide association study of type 2 diabetes in Finns detects multiple susceptibility variants. *Science* 316:1341–1345.
- Zeggini E, et al.; Wellcome Trust Case Control Consortium (WTCCC) (2007) Replication of genome-wide association signals in UK samples reveals risk loci for type 2 diabetes. *Science* 316:1336–1341.
- Wellcome Trust Case Control Consortium (2007) Genome-wide association study of 14,000 cases of seven common diseases and 3,000 shared controls. *Nature* 447:661–678.
- Helgadottir A, et al. (2008) The same sequence variant on 9p21 associates with myocardial infarction, abdominal aortic aneurysm and intracranial aneurysm. *Nat Genet* 40:217–224.
- Omori S, et al. (2008) Association of CDKAL1, IGF2BP2, CDKN2A/B, HHEX, SLC30A8, and KCNJ11 with susceptibility to type 2 diabetes in a Japanese population. *Diabetes* 57:791–795.
- Cauchi S, et al. (2008) Post genome-wide association studies of novel genes associated with type 2 diabetes show gene-gene interaction and high predictive value. *PLoS ONE* 3:e2031.
- Sandhu MS, et al. (2007) Common variants in WFS1 confer risk of type 2 diabetes. *Nat Genet* 39:951–953.
- Franks PW, et al. (2008) Replication of the association between variants in WFS1 and risk of type 2 diabetes in European populations. *Diabetologia* 51:458–463.
- McKay JD, et al.; EPIC Study (2008) Lung cancer susceptibility locus at 5p15.33. *Nat Genet* 40:1404–1406.
- Wang Y, et al. (2008) Common 5p15.33 and 6p21.33 variants influence lung cancer risk. *Nat Genet* 40:1407–1409.
- Murabito JM, et al. (2007) A genome-wide association study of breast and prostate cancer in the NHLBI's Framingham Heart Study. *BMC Med Genet* 8(Suppl 1):S6.
- Timpson NJ, et al. (2009) Adiposity-related heterogeneity in patterns of type 2 diabetes susceptibility observed in genome-wide association data. *Diabetes* 58:505–510.
- Stancáková A, et al.; EUGENE2 Consortium (2008) Single-nucleotide polymorphism rs7754840 of CDKAL1 is associated with impaired insulin secretion in nondiabetic offspring of type 2 diabetic subjects and in a large sample of men with normal glucose tolerance. *J Clin Endocrinol Metab* 93:1924–1930.
- Steinthorsdottir V, et al. (2007) A variant in CDKAL1 influences insulin response and risk of type 2 diabetes. *Nat Genet* 39:770–775.
- Sladek R, et al. (2007) A genome-wide association study identifies novel risk loci for type 2 diabetes. *Nature* 445:881–885.
- Easton DF, et al.; SEARCH collaborators; kConFab; AOCs Management Group (2007) Genome-wide association study identifies novel breast cancer susceptibility loci. *Nature* 447:1087–1093.
- Zanke BW, et al. (2007) Genome-wide association scan identifies a colorectal cancer susceptibility locus on chromosome 8q24. *Nat Genet* 39:989–994.
- Tomlinson I, et al.; CORGI Consortium (2007) A genome-wide association scan of tag SNPs identifies a susceptibility variant for colorectal cancer at 8q24.21. *Nat Genet* 39:984–988.
- Ghoussaini M, et al.; UK Genetic Prostate Cancer Study Collaborators/British Association of Urological Surgeons' Section of Oncology; UK ProtecT Study Collaborators (2008) Multiple loci with different cancer specificities within the 8q24 gene desert. *J Natl Cancer Inst* 100:962–966.
- Haiman CA, et al. (2007) A common genetic risk factor for colorectal and prostate cancer. *Nat Genet* 39:954–956.
- Yeager M, et al. (2007) Genome-wide association study of prostate cancer identifies a second risk locus at 8q24. *Nat Genet* 39:645–649.
- Thomas G, et al. (2008) Multiple loci identified in a genome-wide association study of prostate cancer. *Nat Genet* 40:310–315.
- Tomlinson IP, et al.; CORGI Consortium; EPICOLON Consortium (2008) A genome-wide association study identifies colorectal cancer susceptibility loci on chromosomes 10p14 and 8q23.3. *Nat Genet* 40:623–630.
- Tenesa A, et al. (2008) Genome-wide association scan identifies a colorectal cancer susceptibility locus on 11q23 and replicates risk loci at 8q24 and 18q21. *Nat Genet* 40:631–637.
- Severi G, et al. (2007) The common variant rs1447295 on chromosome 8q24 and prostate cancer risk: Results from an Australian population-based case-control study. *Cancer Epidemiol Biomarkers Prev* 16:610–612.
- Cheng I, et al. (2008) 8q24 and prostate cancer: Association with advanced disease and meta-analysis. *Eur J Hum Genet* 16:496–505.

34. Broadbent HM, et al.; PROCARDIS consortium (2008) Susceptibility to coronary artery disease and diabetes is encoded by distinct, tightly linked SNPs in the ANRIL locus on chromosome 9p. *Hum Mol Genet* 17:806–814.

35. McPherson R, et al. (2007) A common allele on chromosome 9 associated with coronary heart disease. *Science* 316:1488–1491.

36. Helgadottir A, et al. (2007) A common variant on chromosome 9p21 affects the risk of myocardial infarction. *Science* 316:1491–1493.

37. Salonen JT, et al. (2007) Type 2 diabetes whole-genome association study in four populations: The DiaGen consortium. *Am J Hum Genet* 81:338–345.

38. Lyssenko V, et al. (2007) Mechanisms by which common variants in the TCF7L2 gene increase risk of type 2 diabetes. *J Clin Invest* 117:2155–2163.

39. Palmer ND, et al. (2008) Association of TCF7L2 gene polymorphisms with reduced acute insulin response in Hispanic Americans. *J Clin Endocrinol Metab* 93:304–309.

40. Folsom AR, et al. (2008) Variation in TCF7L2 and increased risk of colon cancer: The Atherosclerosis Risk in Communities (ARIC) Study. *Diabetes Care* 31:905–909.

41. Burwinkel B, et al. (2006) Transcription factor 7-like 2 (TCF7L2) variant is associated with familial breast cancer risk: A case-control study. *BMC Cancer* 6:268.

42. Agalliu I, et al. (2008) Evaluation of a variant in the transcription factor 7-like 2 (TCF7L2) gene and prostate cancer risk in a population-based study. *Prostate* 68:740–747.

43. Hunter DJ, et al. (2007) A genome-wide association study identifies alleles in FGFR2 associated with risk of sporadic postmenopausal breast cancer. *Nat Genet* 39:870–874.

44. Stacey SN, et al. (2008) Common variants on chromosome 5p12 confer susceptibility to estrogen receptor-positive breast cancer. *Nat Genet* 40:703–706.

45. Raskin L, et al. (2008) FGFR2 is a breast cancer susceptibility gene in Jewish and Arab Israeli populations. *Cancer Epidemiol Biomarkers Prev* 17:1060–1065.

46. Amos CI, et al. (2008) Genome-wide association scan of tag SNPs identifies a susceptibility locus for lung cancer at 15q25.1. *Nat Genet* 40:616–622.

47. Hung RJ, et al. (2008) A susceptibility locus for lung cancer maps to nicotinic acetylcholine receptor subunit genes on 15q25. *Nature* 452:633–637.

48. Liu P, et al. (2008) Familial aggregation of common sequence variants on 15q24-25.1 in lung cancer. *J Natl Cancer Inst* 100:1326–1330.

49. Thorgeirsson TE, et al. (2008) A variant associated with nicotine dependence, lung cancer and peripheral arterial disease. *Nature* 452:638–642.

50. Stacey SN, et al. (2007) Common variants on chromosomes 2q35 and 16q12 confer susceptibility to estrogen receptor-positive breast cancer. *Nat Genet* 39:865–869.

51. Garcia-Closas M, et al.; Australian Ovarian Cancer Management Group; Kathleen Cuninghame Foundation Consortium for Research into Familial Breast Cancer (2008) Heterogeneity of breast cancer associations with five susceptibility loci by clinical and pathological characteristics. *PLoS Genet* 4:e1000054.

52. Scuteri A, et al. (2007) Genome-wide association scan shows genetic variants in the FTO gene are associated with obesity-related traits. *PLoS Genet* 3:e115.

53. Winckler W, et al. (2007) Evaluation of common variants in the six known maturity-onset diabetes of the young (MODY) genes for association with type 2 diabetes. *Diabetes* 56:685–693.

54. Gudmundsson J, et al. (2007) Two variants on chromosome 17 confer prostate cancer risk, and the one in TCF2 protects against type 2 diabetes. *Nat Genet* 39:977–983.

55. Levin AM, et al. (2008) Chromosome 17q12 variants contribute to risk of early-onset prostate cancer. *Cancer Res* 68:6492–6495.

56. Broderick P, et al.; CORGI Consortium (2007) A genome-wide association study shows that common alleles of SMAD7 influence colorectal cancer risk. *Nat Genet* 39:1315–1317.

57. Gudmundsson J, et al. (2008) Common sequence variants on 2p15 and Xp11.22 confer susceptibility to prostate cancer. *Nat Genet* 40:281–283.

58. Eeles RA, et al.; UK Genetic Prostate Cancer Study Collaborators; British Association of Urological Surgeons' Section of Oncology; UK ProtecT Study Collaborators (2008) Multiple newly identified loci associated with prostate cancer susceptibility. *Nat Genet* 40:316–321.

**Table S2. Cross-tabulation of 10% lower and upper tails of the risk allele distribution in the control and long-lived groups**

|            | All risk alleles   |                     |
|------------|--------------------|---------------------|
|            | <23 alleles (9.4%) | ≥31 alleles (12.9%) |
| Control    | 172 (9.1%)         | 237 (12.6%)         |
| Long-lived | 166 (9.8%)         | 225 (13.2%)         |

OR = 0.99; 95% CI: 0.97–1.03; P = 0.909.

**Table S3. Cross-tabulation of 10% lower and upper tails of the metabolic risk allele distribution in the control and long-lived groups**

|            | Metabolic risk alleles |                    |
|------------|------------------------|--------------------|
|            | <15 alleles (6.8%)     | ≥23 alleles (8.5%) |
| Control    | 136 (7.2%)             | 176 (9.3%)         |
| Long-lived | 108 (6.3%)             | 129 (7.6%)         |

OR = 0.99; 95% CI: 0.95–1.03; P = 0.644.

**Table S4. Cross-tabulation of 10% lower and upper tails of the cancer risk allele distribution in the control and long-lived groups**

|            | Cancer risk alleles |                   |
|------------|---------------------|-------------------|
|            | ≤7 alleles (11.9%)  | ≥13 alleles (12%) |
| Control    | 220 (11.7%)         | 244 (12.9%)       |
| Long-lived | 208 (12.2%)         | 188 (11.0%)       |

OR = 0.97; 95% CI: 0.92–1.01; P = 0.135.

**Table S5. Association of GWA-identified disease risk alleles with longevity**

| Chromosome | SNP        | Position  | Disease profile*  | Risk/Nonrisk <sup>†</sup> | Risk allele frequency |                  |              |                               | Meta-analysis   |                     |                      |
|------------|------------|-----------|-------------------|---------------------------|-----------------------|------------------|--------------|-------------------------------|-----------------|---------------------|----------------------|
|            |            |           |                   |                           | LLS controls          | LLS 90+ subjects | NTR controls | Leiden 85 Plus Study subjects | OR <sup>§</sup> | 95% CI <sup>§</sup> | P value <sup>¶</sup> |
| 1p13.3     | rs646776   | 109620053 | M                 | T/C                       | 0.786                 | 0.737            | 0.778        | 0.777                         | 0.88            | 0.79–0.99           | 0.035                |
| 2q32.3     | rs10497721 | 192622607 | M                 | A/C                       | 0.092                 | 0.113            | 0.093        | 0.090                         | 1.07            | 0.91–1.26           | 0.367                |
| 3p25.2     | rs1801282  | 12368125  | M                 | C/G                       | 0.884                 | 0.883            | 0.892        | 0.873                         | 0.89            | 0.76–1.03           | 0.131                |
| 3q27.2     | rs4402960  | 186994381 | M                 | T/G                       | 0.316                 | 0.284            | 0.300        | 0.305                         | 0.96            | 0.86–1.06           | 0.374                |
| 4p16.1     | rs10010131 | 6343816   | M                 | G/A                       | 0.586                 | 0.562            | 0.590        | 0.600                         | 0.98            | 0.89–1.08           | 0.742                |
| 5q34       | rs10515869 | 163444804 | —                 | A/G                       | 0.444                 | 0.424            | 0.440        | 0.434                         | 0.95            | 0.87–1.05           | 0.320                |
| 5q34       | rs6556756  | 163821858 | —                 | T/G                       | 0.089                 | 0.112            | 0.116        | 0.096                         | 0.97            | 0.83–1.13           | 0.722                |
| 6p22.3     | rs7754840  | 20769229  | M                 | C/G                       | 0.324                 | 0.332            | 0.306        | 0.317                         | 1.05            | 0.95–1.17           | 0.391                |
| 6q25.1     | rs6922269  | 151294678 | M                 | A/G                       | 0.255                 | 0.307            | 0.247        | 0.250                         | 1.12            | 1.00–1.25           | 0.033                |
| 8q24.11    | rs13266634 | 118253964 | M                 | C/T                       | 0.686                 | 0.693            | 0.696        | 0.701                         | 1.03            | 0.93–1.15           | 0.597                |
| 8q24.21    | rs6983267  | 128482487 | C                 | G/T                       | 0.528                 | 0.526            | 0.525        | 0.516                         | 0.98            | 0.87–1.08           | 0.606                |
| 8q24.21    | rs7014346  | 128493974 | C                 | A/G                       | 0.386                 | 0.376            | 0.369        | 0.352                         | 0.95            | 0.86–1.05           | 0.227                |
| 8q24.21    | rs1447295  | 128554220 | C                 | A/C                       | 0.142                 | 0.110            | 0.116        | 0.122                         | 0.91            | 0.79–1.06           | 0.235                |
| 9p21.3     | rs564398   | 22019547  | M                 | T/C                       | 0.572                 | 0.559            | 0.596        | 0.563                         | 0.90            | 0.82–1.00           | 0.037                |
| 9p21.3     | rs10757278 | 22114477  | M                 | G/A                       | 0.457                 | 0.461            | 0.476        | 0.428                         | 0.90            | 0.81–0.99           | 0.026                |
| 9p21.3     | rs1333049  | 22115503  | M                 | C/G                       | 0.542                 | 0.543            | 0.527        | 0.570                         | 1.11            | 1.00–1.22           | 0.030                |
| 9p21.3     | rs10811661 | 22124094  | M                 | T/C                       | 0.823                 | 0.808            | 0.796        | 0.826                         | 1.08            | 0.96–1.23           | 0.216                |
| 10q23.33   | rs1111875  | 94452862  | M                 | C/T                       | 0.593                 | 0.594            | 0.598        | 0.605                         | 1.02            | 0.93–1.13           | 0.680                |
| 10q25.2    | rs7903146  | 114748339 | M                 | T/C                       | 0.278                 | 0.275            | 0.264        | 0.273                         | 1.02            | 0.92–1.14           | 0.720                |
| 10q26.13   | rs2420946  | 123341314 | C                 | T/C                       | 0.392                 | 0.359            | 0.396        | 0.391                         | 0.93            | 0.84–1.103          | 0.167                |
| 11p15.1    | rs5219     | 17366148  | M                 | T/C                       | 0.378                 | 0.344            | 0.370        | 0.359                         | 0.91            | 0.83–1.01           | 0.080                |
| 12q21.1    | rs1495377  | 69863368  | M                 | G/C                       | 0.505                 | 0.528            | 0.494        | 0.519                         | 1.10            | 1.00–1.22           | 0.046                |
| 15q25.1    | rs8034191  | 76593078  | C                 | T/C                       | 0.682                 | 0.682            | 0.662        | 0.683                         | 1.06            | 0.95–1.18           | 0.270                |
| 16q12.1    | rs8051542  | 51091668  | C                 | T/C                       | 0.730                 | 0.730            | 0.756        | 0.715                         | 0.88            | 0.79–0.98           | 0.023                |
| 16q12.1    | rs12443621 | 51105538  | C                 | G/A                       | 0.425                 | 0.439            | 0.421        | 0.446                         | 1.09            | 0.99–1.20           | 0.083                |
| 16q12.2    | rs8050136  | 52373776  | M                 | A/C                       | 0.383                 | 0.371            | 0.391        | 0.388                         | 0.97            | 0.88–1.08           | 0.599                |
| 17q12      | rs757210   | 33170628  | M, C              | T/C                       | 0.384                 | 0.381            | 0.387        | 0.384                         | 0.99            | 0.90–1.09           | 0.772                |
| 17q12      | rs4430796  | 33172153  | M, C <sup>†</sup> | A/G                       | 0.486                 | 0.501            | 0.484        | 0.494                         | 1.05            | 0.96–1.16           | 0.320                |
| 18q21.1    | rs4939827  | 44707461  | C                 | T/C                       | 0.494                 | 0.528            | 0.491        | 0.494                         | 1.06            | 0.97–1.17           | 0.202                |
| Xp11.22    | rs5945572  | 51246423  | C                 | A/G                       | 0.354                 | 0.375            | 0.341        | 0.366                         | 0.99            | 0.91–1.08           | 0.852                |

\*M indicates that the risk allele contributes to metabolic disease (coronary artery disease or type 2 diabetes); C indicates that the risk allele contributes to cancer.

<sup>†</sup>Major allele (A) has been associated with risk for cancer, whereas the minor allele (G) has been associated with type 2 diabetes.

<sup>‡</sup>Major allele is indicated in bold.

<sup>§</sup>Estimation of OR and 95% CI was performed with robust SEs to take into account family dependency in the LLS.

<sup>¶</sup>P values were calculated using robust SEs to take into account family dependency in the LLS.

**Table S6. Sum of risk alleles per age group**

| Age group | Age range | N     | Mean sum of risk alleles (SE) |           |        |        |       |        |
|-----------|-----------|-------|-------------------------------|-----------|--------|--------|-------|--------|
|           |           |       | All                           | Metabolic | Cancer |        |       |        |
| 1         | <26 y     | 116   | 26.56                         | (0.30)    | 18.68  | (0.27) | 9.70  | (0.23) |
| 2         | 26–35 y   | 576   | 26.80                         | (0.14)    | 18.62  | (0.12) | 10.01 | (0.09) |
| 3         | 36–45 y   | 247   | 26.72                         | (0.21)    | 18.71  | (0.18) | 9.79  | (0.13) |
| 4         | 46–55 y   | 344   | 26.92                         | (0.17)    | 18.58  | (0.14) | 10.08 | (0.12) |
| 5         | 56–65 y   | 457   | 27.11                         | (0.16)    | 18.60  | (0.14) | 10.09 | (0.10) |
| 6         | 66–75 y   | 135   | 26.75                         | (0.30)    | 18.25  | (0.24) | 10.17 | (0.19) |
| 7         | 76–85 y   | 547   | 26.83                         | (0.14)    | 18.63  | (0.12) | 10.01 | (0.09) |
| 8         | 86–95 y   | 1,029 | 26.78                         | (0.10)    | 18.61  | (0.09) | 9.92  | (0.07) |
| 9         | 96–98 y   | 101   | 26.82                         | (0.31)    | 18.25  | (0.28) | 10.11 | (0.20) |
| 10        | ≥99 y     | 38    | 26.84                         | (0.47)    | 19.61  | (0.45) | 9.29  | (0.32) |

## Other Supporting Information Files

[Dataset S1 \(XLS\)](#)
